# Supplementary material for: The value of diffusion weighted imaging-alberta stroke program early CT score in predicting stroke-associated pneumonia in patients with acute cerebral infarction: a retrospective study
Source: PeerJ. 2022 Jan 19;10:e12789. doi: 10.7717/peerj.12789 (PMC8783557; doi:10.7717/peerj.12789)
Supplement: Supplemental Information 1 [file peerj-10-12789-s001.xlsx]

## Sheet: Non SAP
gender（M:man;F:female)	age	ASPECT	NIHSS	diabetes mellitus(1:Yes;2:No)	hypertension (1:Yes;2:No)	neutrophil (10^9个/L )	monocyte(10^9个/L )	lymphocyte(10^9个/L )	white blood cell(10^9个/L )	Red blood cell(10^12个/L)	Platelet(10^9个/L)	SAA (mg/L )	CRP(mg/L)	albumin (g/L )	Glucose(mmol/L)	triglyceride (mmol/L)	high-density lipoprotein(mmol/L )	Low-density lipoprotein(mmol/L)	HCY(μmol/L)	CKMB(ng/mL)	MYO(μg/L)	TnI(ng/mL)	NT-proBNP(pg/mL)
M	55	13	4	2	1	3.28	2.35	0.78	6.50	5.07	390.00			42.20	5.04	1.21	0.86	2.38	14.21
M	45	12	4	2	2	4.27	0.42	2.01	6.74	5.23	192.00			40.20	7.49	1.29	0.83	1.02
M	44	13	4	2	1	2.75	0.60	2.06	5.87	4.63	199.00		1.44	34.20	4.48	0.83	1.00	1.84	18.63
M	60	12	2	1	2	4.68	0.69	2.56	8.10	4.84	212.00			38.00	5.00	1.08	0.66	1.31	15.41
M	68	13	2	1	1	2.99	0.35	1.25	4.70	5.09	131.00	<5.00	<0.50	38.10	6.06	1.82	0.79	2.42	26.27	0.34	57.13	<0.006	36.00
M	61	13	2	2	1	4.22	0.49	2.03	6.99	4.85	227.00	18.28	11.50	42.00	3.84	1.19	0.77	1.22	34.91
M	60	12	2	2	1	4.77	0.46	0.89	6.41	4.33	169.00	5.59	1.08	42.70	5.08	1.20	1.03	3.20	14.18
F	73	11	6	1	1	3.87	0.41	0.82	5.21	3.80	126.00	<5.00	2.13	41.50	12.77	2.92	0.72	0.72	12.72	0.80	26.90	0.026	2119
M	61	13	4	2	2	2.39	0.40	1.98	4.88	4.83	183.00	<5.00	1.22	38.50	4.64	1.64	1.00	2.42	10.85
F	44	13	2	2	2	2.12	1.29	0.49	3.95	4.61	425	<5.00	<0.50	42.00	4.81	0.69	1.81	3.03	11.26
F	92	14	1	1	1	3.89	0.24	0.99	5.17	2.88	170.00	<5.00	<0.50	39.80	1.55	0.93	1.06	2.73	22.13	3.06	223.24	0.015	2178
F	72	13	6	2	1	6.30	0.36	2.42	9.77	4.48	259.00	17.26	5.45	36.70	6.04	2.73	0.85	2.46	14.52
M	64	10	6	1	1	3.72	0.53	2.18	6.60	4.88	152	<5.00	2.68	40.60	15.23	1.90	0.65	2.61	15.61
M	64	13	3	2	2	4.38	0.42	2.36	7.34	5.12	295.00	<6.00	0.83	47.70	5.22	2.02	1.12	2.60	17.74
F	81	13	6	2	1	5.89	0.21	0.66	6.78	4.08	150.00	<5.00	3.66	45.00	8.26	0.83	1.23	2.08	11.76	1.07	43.57	<0.006	1013
M	61	13	2	2	1	3.47	0.64	1.28	5.65	4.91	265.00		1.45	42.80	6.40	2.62	0.87	2.60	20.91
F	87	14	3	1	1	2.89	0.33	1.76	5.15	4.55	261.		1.53	42.10	6.35	1.86	1.23	3.79	13.16	0.46	25.82	<0.006	377
M	50	13	4	1	1	4.61	0.43	1.76	7.02	5.19	141.	146.93	8.73	46.90	12.04	2.04	1.24	2.49	17.08
M	49	10	7	1	2	5.25	0.73	1.55	7.69	5.18	147.00	<5.00	<0.50	41.90	7.03	1.06	0.77	2.64	14.68
M	70	10	13	2	2	7.64	1.03	1.61	10.31	5.72	294.00		5.81	39.20	6.01	1.00	1.29	2.44	13.40
F	66	8	14	1	1	9.19	0.92	2.44	12.73	4.64	255.00	102.81	17.39	43.80	8.50	2.30	1.35	2.51	12.71	0.18	33.57	0.012	119.0
M	66	10	5	2	1	6.90	0.86	1.58	9.44	4.82	226.00		27.33	42.71	6.31	1.03	1.15	4.35	15.14	2.74	46.01	0.027
F	92	7	14	2	2	6.32	0.91	0.73	8.03	3.60	161	>200.00	69.79	37.10	5.86	1.00	1.42	2.99	14.94	2.09	86.45	0.046
F	74	12	5	2	2	4.41 10^9个/L	0.38 10^9个/L	1.12 10^9个/L	6.03 10^9个/L	4.23 10^12个/L	168.00 10^9个/L	<5.00 mg/L	<0.50 mg/L	ALB 41.40 g/L	Glu ↑ 6.50 mmol/L	1.54 mmol/L	1.15 mmol/L	1.46 mmol/L	14.97 μmol/L	0.86 ng/mL	28.58 μg/L	0.025 ng/mL	1009.00 pg/mL
M	76	12	1	2	2	3.94	0.74	2.25	7.11	3.61	177.00	9.64	5.71	36.20	4.51	0.81	0.95	2.95	21.24
M	49	10	7	1	1	4.74	0.87	1.86	7.74	3.72	257.00	9.64	5.71	36.20	4.51	0.81	0.95	2.95	21.24
M	47	12	12	2	1	7.60	0.79	2.15	10.89	4.15	348.00	<5.00	9.04	44.00	6.30	3.39	0.68	2.46	13.40	0.48	52.71	<0.006	7.00
M	78	13	8	2	2	9.08	0.95	1.81	11.99	5.76	137.00	21.37	6.33	34.30	3.04	1.05	1.10	1.93	18.97
M	59	12	2	2	2	3.63	0.34	1.51	5.70	5.18	219.00			41.40	7.16	1.58	0.88	3.05	13.08
M	49	13	1	2	2	6.42	0.47	1.56	8.80	4.90	168.00	<5.00	0.63	41.70	4.49	2.76	0.77	1.62	39.41	0.86	50.64	<0.006
M	42	14	8	2	2	4.10	0.52	1.65	6.50	5.31	225.00	<5.00	1.92	41.90	5.00	1.13	1.10	1.77	14.68
F	70	13	1	2	1	2.76	0.52	1.72	5.21	3.49	247	<0.50	<0.50	34.30	4.64	2.15	1.43	1.63
M	38	13	12	2	1	10.02	0.62	1.80	12.50	5.26	199.00			46.70	4.92	1.53	0.82	3.26	18.92
M	64	12	1	2	1	2.05	0.33	1.33	3.86	4.08	152.00		0.21	37.60	4.22	1.00	0.75	2.00	46.04
M	61	13	3	2	1	4.26	0.49	1.92	6.79	4.96	125.00	10.25	6.03	47.10	5.00	1.23	1.67	2.38	21.31
M	70	14	1	1	1	1.88	0.29	1.06	3.38	4.19	111.00	<5.00	0.90	45.90	11.35	1.14	1.44	3.08	19.18
M	50	13	6	2	1	5.26	0.66	2.06	8.11	4.92	192.00	10.70	15.55	44.60	4.95	1.81	1.20	1.43	12.91
M	71	11	5	1	2	4.48	0.60	1.58	6.70	4.76	189.00	<5.00	5.69	42.00	7.42	1.34	1.07	1.41	17.21	0.93	47.48	0.011	204.00
M	71	13	2	2	2	1.68	0.61	3.77	6.39	4.43	185.00	<5.00	<0.50	41.90	4.34	1.62	0.87	3.10	16.46
M	58	8	11	2	1	8.44	0.43	1.23	10.16	5.34	212.00		2.51	42.70	5.87	2.03	0.84	2.91		0.50	60.14	<0.006	11.00
M	57	13	2	1	1	2.12	0.59	1.88	4.67	5.44	213.00		0.28 mg/L	46.90	6.66	2.99	1.71	3.95	13.86
M	59	11	2	2	1	6.24	0.72	1.36	8.72	5.94	216.00	13.09	19.20	43.70	5.19	1.33	1.07	2.98	29.88
M	70	13	3	2	1	6.73	0.68	3.20	10.99	4.99	245.00	<5.00	2.50	38.90	3.85	1.32	1.14	2.98	18.23
M	61	11	1	1	1	4.50	0.84	1.62	7.05	4.36	235.0	<5.00	0.89	41.30	25.55	4.54	1.11	2.94	15.98	<0.18	23.43	<0.006	38.00
F	76	13	4	2	1	3.07	0.54	1.58	5.35	4.07	212.00	9.24	1.88	38.20	4.51	2.56	1.22	2.79	10.96
M	37	13	2	2	2	2.28	0.45	1.40	4.31	4.87	361.00		0.09	41.30	4.57	1.06	0.96	1.35	14.60
M	66	13	5	2	2	5.52	0.31	1.44	7.54	4.88	248.00	<5.00	2.77	45.00	5.23	1.30	1.22	4.02	14.15
M	63	13	1	2	1	4.67	0.52	2.45	7.79	4.09	196.00		5.69	40.20	4.24	1.18	1.20	2.78	17.26	1.32	39.62	0.023
M	62	11	9	2	1	4.46	0.63	1.79	7.00	1.76	246.00		73.23	31.80	4.88	1.15	0.84	1.71	10.02
M	49	12	5	2	2	2.56	0.33	1.57	4.48	4.45	159.00	<5.00	1.10	43.60	4.33	4.94	0.88	2.21	14.99
F	74	11	5	1	1	3.57	0.59	1.86	6.19	4.47	188.0	<0.50	<5.00	45.20	6.80	1.84	0.81	2.77	22.22				162.00
M	55	13	2	1	2	4.40	0.43	1.72	6.73	4.59	236.00	<6.00	0.78	44.20	6.38	3.83	0.90	2.36	30.29	0.36	33.56	<0.006	88.00
M	65	12	1	2	1	6.31	0.63	1.54	8.67	4.55	217.00	12.81	8.89	36.10	6.91	1.39	1.30	2.56	18.21
M	62	5	18	2	1	6.75	0.65	0.92	8.36	4.62	115.00	75.97	13.61	40.70	5.67	1.75	1.23	1.87	16.72	1.05	42.80	0.021
M	52	11	10	2	2	5.18	0.79	2.49	8.60	4.90	197.00		4.63	41.60	5.90	1.50	1.03	3.79	17.60	0.74	37.12	<0.006	40.00
M	63	11	2	2	2	9.72	1.14	1.09	12.02	4.17	198.00	>200.00	37.33	34.80	3.67	0.80	0.73	1.95	16.44	1.68	38.43	0.400	387.00
M	52	13	1	2	1	3.48	0.38	1.67	5.74	5.09	239.00	<5.00	0.58	41.00	4.34	1.95	0.76	2.35	23.02
M	45	11	13	2	2	4.80	0.79	2.46	8.30	5.47	186.00	<5.00	1.52	43.60	4.72	1.93	0.69	2.71	22.38
M	56	8	13	2	2	7.73	0.41	1.24	9.45	4.17	166.00	<5.00	<0.50	43.29	5.40	1.44	1.16	3.52	12.81	1.39	44.65	<0.006	621.00
F	64	12	6	1	2	3.33	0.58	2.43	6.42	4.32	207.00	8.34	6.80	35.10	7.49	1.14	0.80	1.45	10.81
F	81	13	2	2	1	3.01	0.56	1.12	4.93	3.11	145.00		20.85	31.30	5.35	1.10	1.10	2.23	20.33
M	67	13	1	2	2	5.52	0.47	1.34	7.42	4.87	358.00		3.90	39.80	4.72	1.12	1.05	3.32	13.59
F	61	7	9	1	1	4.33	0.75	0.93	6.03	4.33	152.00	118.79	24.85	38.90	8.57	2.51	0.82	1.62	17.80
F	77	13	1	2	1	4.65	0.29	1.66	6.66	4.82	160.0	<5.00	0.74	42.30	5.10	1.27	1.25	2.35	14.30	1.26	42.23	0.011	91.00
F	83	10	6	1	1	8.73	0.53	0.86	10.14	4.01	132.00		4.43	48.10	16.83	0.68	1.64	3.03	31.07	2.10	60.75	0.012	586
M	59	13	2	1	2	1.91	0.28	1.62	3.89	4.93	145.00	<5.00	1.52	38.80	11.28	2.80	0.71	2.88	12.91
M	65	13	1	2	2	2.85	0.89	2.38	6.29	3.71	201.00	6.20	9.10	31.20	4.17	0.94	0.93	1.57	15.31
M	48	13	1	2	1	7.02	0.49	2.49	10.14	5.24	212.00	6.81	2.07	42.70	6.36	0.91	1.15	3.36	3.91			0.021	213.00
M	66	13	3	2	1	3.61	0.42	0.75	5.18	4.68	175.00	138.78	27.31	31.50	4.08	1.72	0.74	1.85	51.84
F	58	13	11	2	1	5.66	0.52	2.47	8.66	2.98	201.00	108.76	15.82	37.20	6.31	3.92	0.75	2.48	11.58
M	54	13	4	1	1	3.72	0.41	1.29	5.61	4.67	224.00	<5.00	0.60	41.90	8.84	1.48	0.74	1.17	17.22
F	69	12	2	2	2	3.78	0.45	2.24	6.52	4.94	185.00	<5.00	3.80	40.20	4.99	2.59	1.19	2.44	12.40
M	71	13	8	1	1	6.43	0.58	1.82	9.27	5.16	220.00		2.45	42.70	6.76	3.01	0.85	2.60	18.75
M	62	13	4	2	1	6.82	0.41	1.30	8.57	4.45	219.00		8.24	38.10	4.56	1.01	0.87	2.89	12.11
F	74	10	17	2	1	7.07	0.60	1.53	9.22	4.58	263.00	<5.00	6.95	44.80	6.71	1.67	1.01	2.95	14.67	0.27	40.82	0.071	732.00
M	59	12	5	2	1	4.78	0.46	2.09	7.50	3.56	295.00	>200.00	60.34	42.30	4.01	1.41	0.63	2.23	>65.00
F	67	12	10	2	2	6.91	0.30	1.53	8.80	4.49	252.00		1.85	49.10	5.73	1.94	1.45	2.26	13.44	1.76	46.41	<0.006	88.00
M	43	10	5	2	2	4.20	0.59	3.62	8.59	5.48	267.00	<5.00	3.42	44.30	10.26	2.89	0.78	2.40	14.90
M	84	13	7	1	1	4.82	0.61	1.56	7.09	4.67	193.00	<5.00	5.91	42.10	9.86	1.05	1.87	3.00	18.83				67.00
M	59	13	2	2	2	3.90	0.47	2.09	6.66	5.14	166.00	9.80	0.59	47.60	4.91	2.84	1.31	3.89	15.83
M	56	12	5	1	1	3.29	0.44	1.18	5.18	4.78	143.00		1.66	41.10	5.64	1.29	0.98	2.04	19.56
M	31	12	8	2	2	4.92	0.68	2.03	7.83	4.79	261.00		1.52	40.50	4.45	1.66	0.72	3.21	14.37
M	57	10	16	2	2	4.78	0.50	1.46	6.83	5.25	218.00		1.98	44.10	6.05	1.43	1.14	3.60	15.75
M	83	13	3	2	1	3.53	0.31	0.50	4.35	4.88	177.00	<6.00	<0.50	39.30	5.31	1.11	0.77	2.46	13.55
F	75	12	3	1	1	6.36	1.79	0.63	8.91	4.94	303.00	8.11	8.83	46.40	8.02	3.52	0.87	3.22	11.30
M	72	12	6	1	1	5.52	0.50	1.80	8.14	5.31	124.00	<5.00	4.42	38.20	4.70	0.93	0.87	2.40	19.19	1.33	38.01	<0.006	1250
M	69	13	4	2	1	3.03	0.43	1.53	5.12	4.55	167.00	<5.00	1.87	41.80	4.49	0.65	1.23	2.17	22.72
F	61	12	7	1	1	3.72	0.50	3.28	7.58	5.31	222.00	6.18	3.83	45.20	10.39	1.98	1.00	3.45	16.12
M	80	13	5	2	1	4.35	0.57	1.43	6.46	4.25	185.00	95.09	45.13	38.80	4.48	1.16	0.87	2.03	20.79	1.83	158.17	0.018	715.00
F	77	13	3	1	1	3.47	0.56	1.89	5.99	4.52	297.00	<5.00	2.74	42.40	5.34	1.70	0.87	4.05	14.82	2.13	85.35	<0.006	49.00
M	67	12	5	2	1	2.15	0.23	1.24	3.74	4.94	325.00	<6.00	0.54	38.50	4.85	1.38	1.14	4.21	21.22
M	59	13	3	1	1	3.59	0.50	1.26	5.43	4.81	286.00	<5.00	0.66	39.00	5.64	1.56	0.71	3.00	15.80
M	56	10	15	2	2	5.44	0.14	0.39	5.98	4.45	182.00		0.48	38.20	11.10	0.69	2.83	2.45	11.74	7.68	119.85	<0.006	42.00
M	57	13	1	2	1	6.16	0.75	1.70	8.84	5.23	151.00	<5.00	<0.50	41.20	5.50	2.96	1.01	3.36	14.92	0.59	63.48	0.009	30.00
F	62	12	2	1	1	4.26	0.47	2.71	7.63	4.84	345.00	<5.00	1.56	40.30	6.42	1.39	1.06	4.22	9.09
M	70	12	4	2	1	6.70	0.47	0.90	8.07	4.47	157.00	<5.00	<0.50	44.90	5.66	0.82	1.03	2.83	15.25
M	39	13	4	2	1	6.72	0.73	1.33	9.12	4.86	278.00	23.05	19.67	48.60	5.01	2.29	1.33	1.89	10.36
F	61	13	1	2	1
M	56	12	5	2	1	4.96	0.42	3.07	8.64	5.17	316.00	13.51	0.56	45.80	5.42	1.22	0.95	3.37	18.97
F	78	13	2	1	2	11.48	1.09	0.92	13.52	4.15	263.00	>200.00	107.20	44.70	15.40	1.47	2.10	3.88	11.44
M	69	9	13	2	1	7.51	0.33	0.60	8.48	5.00	258.00	<5.00	0.66	42.70	4.80	0.81	1.27	3.65	16.28
F	65	8	12	2	1	4.38	0.77	2.53	8.58	4.12	226.00		13.64	43.70	6.51	1.60	1.03	3.37	18.34	1.25	134.55	0.014
M	54	11	3	1	1	4.79	0.44	2.86	8.17	4.52	120.00		2.03	41.40	9.75	1.15	0.68	1.56	12.21	0.92	43.23	0.006
M	64	12	9	2	2	15.60	0.95	0.67	17.29	3.82	434.00	<5.00	0.66	40.00	5.00	0.81	1.51	3.24		2.50	830.29	<0.006	11.00
F	66	12	8	2	2	4.61	0.35	1.16	6.20	4.75	183.00	9.46	2.69	44.40	5.17	1.28	1.61	2.86	13.05	1.81	41.10	0.810	593.00
F	70	13	1	1	1	2.42	0.40	2.60	5.61	4.54	222.00	7.45	5.06	39.00	9.52	1.35	1.45	2.11	8.88				108.00
M	64	12	15	1	1	8.74	0.61	1.95	11.35	6.10	208.00	55.92	25.55	46.00	16.16	1.95	0.72	2.26	29.27
F	81	12	4	2	1	5.60	0.22	1.01	6.85	4.42	97.00	<6.00	2.01	44.90	6.88	1.62	1.10	2.08	13.75
M	54	13	9	2	1	4.43	0.57	1.26	6.47	5.32	302.00	<5.00	1.72	50.10	5.94	3.28	1.29	5.52	17.40
M	80	13	6	1	1	8.33	0.53	1.25	10.44	3.79	312.00		0.44	49.50	14.58	1.08	1.10	3.09	26.68
F	79	9	7	1	1	7.20	0.80	1.02	9.04	5.51	274.00		10.31	48.80	9.76	0.55	1.44	1.56	20.04
F	78	12	3	2	1	4.80	0.51	1.59	7.04	4.38	246.00		0.16	46.00	5.02	0.77	1.51	2.44	16.17
M	64	11	3	2	1	4.99	0.50	1.56	7.24	4.82	231.00	9.40	2.26	40.20	4.42	1.12	0.68	2.00	27.72
M	67	11	3	2	2	4.21	0.90	1.59	6.82	5.45	261.00	<5.00	0.72	44.10	4.76	1.31	0.86	3.53		0.19	56.48	<0.006	26.00
F	62	12	7	2	1	2.43	0.43	1.48	4.46	4.32	150.00	<5.00	0.54	40.80	5.84	2.63	1.12	1.79	12.50
M	83	13	1	2	1	3.12	0.60	1.35	5.22	4.59	137.00	<5.00	1.77	37.10	5.32	1.43	1.52	2.37	10.35
M	59	13	2	2	1	5.34	0.52	3.32	9.25	4.66	266.00	<5.00	1.00	46.06	6.20	6.12	1.04	1.46	22.02
F	66	13	8	1	2	3.83	0.58	1.97	6.47	4.79	195.00	<6.00	<0.50	42.10	16.31	3.10	1.02	4.44	15.11	0.46	33.01	<0.006	49.00
F	65	13	1	2	2	4.16	0.36	3.26	8.03	4.82	77.00	7.39	2.73	44.10	5.16	3.34	1.07	3.73	12.17
M	84	11	11	2	2	5.40	0.57	1.39	7.38	4.25	92.00	6.12	1.28	41.10	5.63	0.97	1.17	1.08
M	57	7	17	2	2	5.02	0.78	1.46	7.38	5.43	165	<5.0	1.60	38.50	4.50	1.75	0.82	3.28	12.60	1.33	54.84	<0.006	2808.
F	68	8	15	1	1	11.37	0.82	0.61	12.88	4.59	200.00	>200.00	46.97	45.00	9.83	0.93	1.33	3.37	14.29	<0.18	17.77	<0.006	174.00
M	36	13	3	1	1	7.17	0.85	2.52	10.79	6.02	275.00		2.37	45.50	9.87	3.67	0.68	2.80	15.38
F	75	13	2	1	1	7.08	1.07	1.19	9.38	4.46	193.00	29.10	6.10	44.40	8.15	1.03	1.48	3.80	12.68
M	61	12	8	2	1	5.38	0.41	1.47	7.33	4.63	178.00		4.15	43.00	5.69	1.65	1.24	3.50	14.37
M	84	9	6	1	2	4.72	0.64	1.36	6.94	4.60	238.00	<5.00	2.48	36.90	5.14	0.94	1.37	2.11	19.73	2.05	88.29	0.021	179.00
M	79	10	3	2	1	3.37	0.47	1.27	5.26	3.74	186.00	5.80	0.98	38.40	4.80	0.78	1.63	1.89	19.92	2.34	110.06	0.006	375.00
F	72	10	19	1	1	4.87	0.25	1.05	6.20	3.37	181.00	<5.00	3.14	36.10	6.20	0.96	1.14	1.02	10.70	2.06	91.27	0.020	1261.00
M	76	13	5	2	1	6.32	0.79	1.71	8.95	5.37	178.00	8.43	1.34	43.20	5.75	2.21	1.23	4.84	14.73	2.52	60.30	0.072	328.00
F	45	11	9	2	2	5.78	0.34	0.89	7.05	4.08	227.00	5.09	0.64	38.58	5.00				9.76	1.68	41.37	<0.006	317.00
M	69	9	11	1	1	9.29	0.64	0.84	10.81	3.75	115.00	<5.00	2.28	40.40	7.91	0.58	1.52	1.38	21.81
F	64	7	25	2	1	11.09	0.67	1.19	12.97	5.05	217	7.93	3.14	48.90	6.30	1.67	1.24	2.86	23.36	2.59	60.38	<0.006	209
M	49	11	9	2	2	4.83	0.55	2.04	7.59	5.70	200.00	<5.00	<0.50	43.97	6.00	2.15	0.80	2.50	13.03
F	85	10	10	2	1	8.87	0.48	3.62	13.01	4.61	104.00	<5.00	5.60	42.50	4.62	1.73	0.66	2.19	37.31	1.16	46.71	0.042	2755.00
F	76	12	6	2	1	3.48	0.33	1.06	4.99	4.27	180.00	98.62	0.58	46.50	6.10	0.84	1.23	2.34	12.33	2.82	86.00	0.008	686.00
M	63	11	6	2	2	3.28	0.37	1.35	5.10	4.11	245.00	7.42	0.99	37.75	5.10	1.29	1.02	3.35	26.82
M	68	12	5	1	1	3.78	0.45	1.49	6.04	4.04	312.00	19.55	24.42	42.61	9.00				15.39	0.74	105.78	<0.006	45.0
M	57	4	16	2	1	6.32	0.35	0.72	7.43	4.74	221.00	<5.00	0.74	47.00	6.02	1.10	1.28	4.58	13.14
M	61	8	10	2	2	5.43	1.00	1.21	7.66	5.37	140.00			43.70	6.26	0.93	0.91	2.22	12.81
M	71	9	23	2	1	7.73	0.40 10^9	0.71	8.88	4.94	198.00		0.62	42.46	7.60				11.76	1.43	29.14	0.017	819.00
M	56	12	1	2	1	7.27	0.58	1.43	9.31	4.36	214.00	52.29	3.31	43.00	4.37	1.10	0.86	1.80	14.50
F	69	12	2	1	1									36.70	17.49	6.39	1.11	2.49	21.60
M	64	13	1	1	1	4.73	0.44	1.55	7.28	4.42	170.00	<6.00	1.88	47.10	4.53	2.88	0.61	2.01
F	74	6	13	2	2	15.73	0.47	1.57	17.80	3.86	254.00		27.73	43.27	9.00	1.35	1.03	1.99	9.94	1.49	85.62	0.011	617.00
F	67	9	25	1	1	5.55	0.16	0.59	6.31	3.74	269.00	<5.00	3.68	48.70	11.21	0.79	1.43	1.66	8.42	0.97	111.01	<0.006	474.00
F	84	13	1	2	1	2.28	0.31	1.25	3.92	3.04	161.00	35.00	1.45	35.00	4.35	0.55	1.45	3.08	18.34
M	50	13	2	2	1	5.56	0.32	2.14	8.29	4.76	358.00	<6.00	3.18	43.50	5.99	2.45	0.75	2.90	13.20
F	80	12	3	1	1	5.57	0.74	1.72	8.15	4.17	159.00	<6.00	<0.50	41.00	5.23	1.40	1.15	1.22	10.50	2.40	44.88	0.009	1073
M	31	13	1	2	2	5.11	0.81	3.16	9.25	4.93	272.00	<5.00	0.75	40.80	4.93	0.62	0.89	2.89	28.18
M	56	12	11	1	2	7.03	0.83	2.79	10.74	4.91	268.00		16.55	40.70	10.16	1.26	1.12	2.21	17.22
F	82	12	2	1	2	6.76	0.49	1.02	8.30	3.02	212.00	76.16	4.76	37.11	8.10					0.56	54.44	0.010	468
F	88	12	6	1	1	5.80	0.70	1.49	8.05	4.57	250.00			35.40	4.09	0.81	0.88	4.15	7.84
M	85	11	19	2	2	7.59	0.61	1.13	9.36	4.27	109.00	<5.00	<0.50	43.50	7.00	0.69	1.12	1.92	15.66	3.38	88.99	<0.006	107
M	55	12	5	2	2	3.38	0.77	1.71	6.05	5.55	198.00	<5.00	<0.50	43.90	4.45	4.27	0.81	1.37	15.56
M	85	13	1	2	2	6.06	1.02	0.36	8.13	5.03	145.00		134.91	38.40	5.47	1.10	1.20	2.85	16.49	0.91	100.88	0.032	488.00
M	64	13	2	2	2	4.15	0.65	1.57	6.74	4.80	191.00	36.70	8.86	44.20	4.63	1.27	1.03	3.21	20.60
F	31	7	4	1	1	4.63	0.76	2.01	7.56	4.57	438.00	<5.00	1.64	38.50	4.27	2.22	1.23	2.33	11.93
M	61	13	2	2	2	3.72	0.71	2.22	7.07	5.17	211.00	<5.00	0.56	42.40	3.60	1.20	0.90	3.24	21.00	1.28	51.15	<0.006
F	88	13	1	2	2	1.99	0.38	1.49	4.27	3.58	116.00		10.32	37.30	4.75	1.02	1.31	1.82	46.92
F	77	13	5	2	2	4.19	0.41	2.74	7.72	4.71	254.00	<5.00	2.20	43.30	5.79	2.91	1.34	3.86	11.88	0.99	40.19	0.110	38.00
F	56	13	3	2	1	1.88	0.37	1.55	3.97	4.22	217.00	<5.00	<0.50	43.90	4.91	1.06	2.04	2.69
F	85	12	2	2	2	2.85	0.56	2.28	5.92	4.26	192.00		1.68	35.40	5.43	1.17	0.88	3.53	16.09
F	54	13	2	1	1	3.02	0.25	1.27	4.66	4.29	215.00	<5.00	2.26	39.40	6.73	1.76	0.93	2.48	11.22
F	74	13	2	2	2	3.51	0.43	1.73	5.72	3.52	234.00	<5.00	0.83	36.50	5.30	0.72	1.02	2.95	16.81	2.55	42.55	0.016	536.00
M	54	13	1	2	2	3.13	0.51	1.55	5.37	5.05	129.00	10.88	7.87	41.40	8.80	1.54	0.93	2.59	16.45	0.98	29.84	0.006	137.00
F	68	12	6	1	1	9.09	0.71	1.33	11.22	5.39	174.00	20.23	4.59	44.30	16.33				11.36
M	65	9	13	1	1
F	61	13	3	1	2	1.58	0.25	1.69	3.65	4.19	182.00	<5.00	0.55						12.53
F	60	11	4	1	1	3.31	0.42	1.38	5.17	4.99	154.00	<5.00	1.87	35.60	15.58	2.30	0.83	2.46	12.07
M	59	9	13	1	2
F	78	11	1	2	1	2.01	0.40	0.80	3.33	3.16	120.00	5.93	2.72	34.60	5.19	0.79	0.82	1.60	14.30	0.18	49.76	0.009	535.00
M	62	13	5	2	2	5.61	0.42	1.07	7.17	4.46	178.00	0.72	<5.00	40.80	5.18	2.03	0.98	2.21	21.86
M	81	13	2	2	2	3.07	0.29	1.18	4.81	4.39	159.00	16.94	1.42	41.10	4.27	0.76	1.14	2.36	20.58
F	61	13	4	2	2	3.55	0.26	0.75	4.63	4.45	159.00			45.80	5.79	0.65	0.80	2.42	11.50
M	47	13	3	2	1	6.93	0.69	1.95	9.71	5.01	229.00	240.00	101.87	47.10	5.92	2.09	0.92	2.79	19.36
F	83	13	10	2	1	7.14	0.40	1.00	8.57	4.07	224.00	<5.00	<0.50	37.10	4.52	0.67	1.32	2.05	16.69	3.61	125.80	0.058	3059.0
M	65	12	10	2	2	5.27	0.48	2.09	8.16	5.33	270.00	<5.00	0.57	45.00	5.75	1.25	1.27	2.76	13.20
F	41	12	4	1	1	2.81	0.54	3.67	7.19	4.26	295.0	<5.00	<0.50	39.90	8.21	0.78	1.25	2.39	10.91
M	49	11	7	2	1	8.72	0.98	1.47	11.22	5.11	270.00	54.96	10.29	44.10	7.62	2.70	0.95	3.39	37.11
M	42	13	2	1	1	2.53	0.42	2.20	5.24	4.57	205.00	8.45	1.72	42.80	7.25	1.57	0.75	2.45	12.30
M	54	12	7	2	1	9.55	0.50	1.07	11.33	4.97	288.00	<5.00	0.76	40.00	6.80	1.39	0.98	3.25	29.02	1.86	63.06	0.019
M	53	11	2	1	2	7.59	0.42	1.08	9.48	5.69	240.00	38.29	18.82	39.80	10.17	2.42	0.75	2.37
F	56	13	2	1	1								4.74	40.10	7.00	3.45	1.11	1.47	10.86	0.88	37.78	<0.006	74.00
M	65	13	4	2	1	5.79	0.89	2.18	9.36	4.42	308.00	<5.00	<5.00
M	74	12	3	2	2	5.04	0.73	2.26	8.13	4.02	306.00	<5.00	1.37	40.60	4.95	2.85	0.67	2.73	16.94	3.22	60.85	0.013	537.00
M	82	12	8	2	2	4.07	0.58	1.59	6.36	4.14	254.00	<6.00	1.08	36.60	5.15	1.01	0.83	1.76	22.37
M	59	11	6	1	1	7.01	0.90	1.43	9.40	5.49	254.00	11.92	1.43	46.80	8.95	2.36	0.93	2.70	19.52
F	60	13	3	2	1	3.35	0.40	1.62	5.58	4.08	243.00	<6.00	1.26	40.50	4.75	1.72	0.83	2.33	15.13
M	72	10	12	2	1	7.00	0.51	1.18	8.75	4.73	217.00	<5.00	1.69	43.70	7.60	1.33	1.32	3.30		3.24	65.72	0.256	1747.0
F	93	8	14	2	1	12.42	0.57	1.37	14.40	4.32	331.00			45.00	5.57	1.33	1.57	4.37	31.79	1.40	119.93	<0.006	975
M	71	13	2	2	2	3.14	0.36	1.06	4.60	4.05	87.00	5.05	1.05	37.00	5.12	1.16	1.05	2.55	13.18
F	41	11	3	2	1	4.45	0.36	1.55	6.59	4.63	158.00	8.21	2.18	43.90	13.60				8.10	0.18	15.52	0.006	30.00
M	78	12	14	2	2	4.86	0.67	1.31	7.02	5.01	204.00	14.22	7.84	38.40	4.18	0.86	1.21	1.37
F	67	13	4	1	1	1.69	0.21	1.33	3.39	3.88	111.00	5.00	0.63	37.20	4.25	1.92	0.95	2.12	23.57
M	47	13	5	2	1	5.32	0.66	2.13	8.31	4.94	128.00	5.00	1.00	38.60	11.99	2.62	0.74	2.28	15.68
F	77	11	3	1	1	3.88	0.51	1.12	5.73	3.97	126.00	5.69	2.41	39.80	4.79	0.84	1.28	1.70	17.81
F	67	12	4	1	1	4.00	0.46	2.58	7.22	4.78	369.00		1.35	40.70	8.47	2.57	1.38	2.76	13.71
M	74	13	5	2	2	5.57	0.57	1.67	7.90	4.3	347.00		0.09	37.40	4.74	0.99	1.37	1.82	14.22
M	68	13	1	2	1	2.79	0.42	1.50	4.95	4.59	245	<5.00	1.80	41.10	4.03	2.02	0.79	3.02	24.67	1.68	85.37	0.019	31.00
M	89	13	3	2	1	6.23	0.75	1.24	8.43	3.40	251.00	200.00	37.84	38.50	4.99	0.82	0.76	1.60	13.12	1.11	63.39	0.006	154.00
M	59	13	2	2	2	4.35	0.54	3.10	8.18	4.86	293.00	5.57	0.92	46.90	5.62	2.54	1.27	3.85	18.39
M	52	13	2	2	2	5.35	0.43	1.64	7.64	4.74	313.00			42.70	4.91	1.59	1.35	2.69	39.13
F	67	13	1	2	1	3.73	0.48	3.02	7.33	4.64	238.00	7.33	1.88	40.40	5.19	2.19	0.92	3.27	11.29
M	71	12	2	1	1
M	48	13	1	2	1
M	62	13	1	2	1
F	56	13	2	1	1
M	46	12	6	2	1
M	63	13	2	2	1
F	67	13	1	1	1
M	65	12	3	2	2
M	62	13	1	1	2	3.36	1.04	1.39	5.88	4.46	225.00		14.01	45.20	6.31	1.37	1.31	2.60
M	72	13	4	2	2	4.30	0.54	1.52	6.55	4.54	157.00	7.80	1.06	39.00	5.27	1.17	0.87	2.63	18.33	0.95	39.92	0.006
M	36	13	2	2	1	4.58	0.55	1.91	7.60	5.00	233.00	6.00	0.85	41.60	5.35	1.62	0.90	2.59	50.15
M	69	13	5	2	1	3.32	0.54	1.39	5.34	4.59	260.00	5.00	1.64	45.80	4.78	1.99	1.08	4.00	18.35
F	60	12	7	2	2	6.50	0.19	1.23	7.95	4.43	146.00	5.00	1.58	42.20	6.09	0.57	1.47	2.79	12.06	1.11	30.95	0.006	131.00
M	72	7	5	1	1	7.72	0.47	0.66	8.94	4.59	186.00	7.46	2.95	40.90	14.20	1.37	1.31	2.54	28.19	2.32	124.33	<0.006	352.00

## Sheet: SAP
gender（M:man;F:female)	age	ASPECT	NIHSS	diabetes mellitus(1:Yes;2:No)	hypertension (1:Yes;2:No)	neutrophil (10^9个/L )	monocyte(10^9个/L )	lymphocyte(10^9个/L )	white blood cell(10^9个/L )	Red blood cell(10^12个/L)	Platelet(10^9个/L)	SAA (mg/L )	CRP(mg/L)	albumin (g/L )	Glucose(mmol/L)	triglyceride (mmol/L)	high-density lipoprotein(mmol/L )	Low-density lipoprotein(mmol/L)	HCY(μmol/L)	CKMB(ng/mL)	MYO(μg/L)	TnI(ng/mL)	NT-proBNP(pg/mL)
M	52	6	16	1	1	7.07	0.70	1.93	9.73	5.62	224.00	15.66	6.33	46.57	7.80	5.89	0.88	1.87	12.12	1.36	65.71	0.314	104
F	81	12	10	2	1	3.50	0.43	1.57	5.58	4.35	208.0	<5.00	8.52	45.20	5.70	1.56	1.57	2.60	19.49	1.70	125.79	0.064	4476
M	62	11	12	2	2	8.43	0.50	0.78	9.73	4.97	248.00	<5.00	2.61	42.40	6.40	1.12	1.38	2.49	18.08
F	74	10	9	2	1	6.03	0.58	2.46	9.17	4.23	235.00	8.06	3.67	37.60	4.61	1.61	1.00	2.85	19.79	0.81	39.09	<0.006	354.00
F	101	13	30	2	1	8.13	0.79	0.39	9.34	4.73	178.	>240.00	69.02	32.10	6.60	1.14	1.15	2.24	27.41	7.07	238.80	0.263	5918
F	85	13	23	2	2	4.43	0.33	1.93	6.74	5.30	151.00	<5.00	<0.50	44.03	5.70	1.09	1.27	4.33	12.48	1.18	45.88	0.032	243.00
F	56	12	8	1	1	3.45	0.62	2.89	7.09	5.05	179.00	<5.00	0.91	43.18	7.10				9.59	0.68	25.10	<0.006	37.00
F	92	9	13	1	1	5.84	0.72	1.97	8.68	3.94	262.00		10.47	32.30	4.79	0.73	1.13	1.51	8.98
M	67	11	8	2	1	9.05	0.88	1.64	11.78	4.62	165.00	7.72	9.10	40.50	5.32	1.53	0.85	3.74	11.12
F	82	8	17	2	1	6.13	0.66	0.24	7.06	3.43	102.0	<5.00	<0.50	36.80	5.98	0.83	1.08	1.51	9.20	3.31	115.89	0.033	1846.00
M	79	13	2	2	1	4.61	0.51	1.47	6.70	4.17	221.00	<5.00	5.06	39.40	7.06	2.37	0.88	3.49	27.51	1.08	91.08	0.006	105.00
M	65	11	14	2	1	4.27	0.69	0.85	5.91	4.69	99.00	68.61	8.91	42.30	5.88	1.04	2.00	4.37	>65.00	2.13	61.65	0.036	906.00
M	84	8	18	2	1	7.84	0.77	2.27	11.08	4.93	176.00	8.48	6.74	42.72	5.25	2.49	0.83	2.46	21.67	5.48	117.48	0.011
M	71	8	21	2	2	8.83	0.35	0.67	9.88	3.60	86.00	20.75	19.97	36.90	6.29	0.94	1.44	1.95	12.99	1.24	71.34	0.223	5118
M	87	13	1	2	1	3.68	0.29	0.79	4.86	4.44	166.00		3.33	37.80	4.70	1.48	0.76	1.69	11.70
M	88	11	5	2	1	5.65	0.67	1.79	8.38	5.17	561.00	<5.00	2.44	38.60	4.35	1.30	0.67	1.42		0.86	57.74	0.009	102.00
M	80	12	11	1	1	3.27	0.46	1.45	5.48	3.94	189.00	55.02	13.32	41.10	7.64	2.45	0.98	3.17	>65.00	2.91	114.01	0.174	2594.00
M	62	13	1	2	1	2.74	0.36	1.60	4.80	4.59	293.00	11.22	6.29	40.50	4.11	1.58	1.30	2.97	14.75
M	89	13	6	2	2	3.17	0.52	1.42	5.18	3.92	119.00	9.60	1.69	36.90	3.83	0.62	1.70	2.52	22.60
M	61	11	2	1	2	2.68	0.42	1.78	5.07	5.07	128.00	18.94	1.88	42.00	3.82	1.72	0.70	1.97	18.40
M	39	10	10	1	2
M	81	13	8	2	1	4.70	0.36	1.95	7.14	3.87	188.00	<6.00	0.78	40.10	4.56	1.61	0.98	1.85	25.65	0.83	55.16	0.006	480.00
M	69	13	4	1	1	4.40	0.33	2.16	7.03	5.91	190.00	6.05	0.71	49.10	9.30	3.34	0.87	2.44		1.04	21.62	<0.006	61.00
M	77	10	18	1	1	10.28	0.53	0.92	11.77	4.35	171.00	<5.00	0.69	41.86	13.80	2.72	0.93	2.55	13.87	0.88	110.56	<0.006	446.00
M	68	8	19	2	1	10.11	1.08	1.46	12.72	5.04	198.00	187.36	23.30			1.85	1.35	2.63	16.53
M	71	7	16	2	1	11.46	0.52	1.35	13.33	5.41	179.00		23.83	44.70	7.68	1.02	0.94	3.29	19.67	3.90	116.08	1.807	2153.00
F	58	8	17	2	2	4.74	0.62	1.78	7.54	4.20	124.00	10.52	16.01	41.17	6.00	1.67	1.08	2.85	12.74	1.27	27.26	1.675	186
F	90	10	16	1	1	14.32	0.59	0.49	15.40	3.24	182.00	146.24	70.35	28.30	5.25	1.02	0.46	0.63	20.43				7101
F	82	10	10	2	1	4.38	0.28	1.11	5.80	4.64	124.00	<5.00	1.21	43.50	6.30	0.81	1.64	1.42	26.25	2.83	189.42	0.021	2796.00
M	53	9	11	2	1	12.18	0.73	0.86	13.90	3.61	249.00	>200.00	54.82	42.00	5.79	3.19	0.82	2.66	17.33	<0.18	60.59	<0.006
F	70	11	34	2	2	2.31	0.51	0.26	3.08	2.33	70.00	12.32	13.21	26.10	7.80	0.66	0.78	0.93		32.01	427.73	17.448	46720.00
M	70	12	5	2	1	4.80	1.04	1.73	7.89	5.06	113.00	51.68	28.87	36.90	4.99	1.23	1.08	3.05		2.00	110.28	0.014	105
F	49	11	11	2	1	8.73	0.82	3.25	12.93	5.28	285.00	<5.00	2.42	41.65	9.60	3.96	1.11	3.57	9.41	<0.18	15.15	<0.006	43.00
M	89	11	25	2	2	3.82	0.47	0.43	5.05	3.30	194.00		0.42	38.44	10.80	0.59	1.41	0.95	6.39	1.43	128.16	0.009	228.00
M	71	6	16	2	2	9.77	0.33	1.43	11.57	3.43	236.00	15.99	12.78	40.60	16.99	1.09	0.91	2.74	28.08	1.44	148.67	<0.006	135.00
F	70	7	10	2	1	5.63	0.46	1.58	7.73	4.05	144.00	194.92	16.95	34.90	4.89	1.06	1.09	1.41	11.23	0.97	46.87	0.045	2054
M	82	8	13	1	1	9.18	0.77	0.96	10.92	4.10	207.00	113.97	26.08	49.00	8.94	1.17	1.58	2.72	15.34	1.09	76.14	0.007	113
M	73	5	13	1	1	9.48	0.77	1.06	11.34	5.14	196.00	99.40	30.30	39.00	9.80	1.67	1.01	1.83	13.64	0.76	36.53	0.039	1119.00
M	60	8	23	2	1	7.16	0.54	1.48	9.20	4.29	166.00		14.03	43.80	5.94	0.94	1.46	2.13	12.63	19.83	109.74	15.340	1844.00
M	49	6	16	2	1	6.64	0.46	2.19	9.38	4.75	272.00	5.70	2.79	40.40	7.80	3.07	0.78	2.14	8.15	2.10	82.06	0.026	3375.00
F	84	9	16	1	2	8.90	0.67	0.48	10.06	4.20	83.00	>200.00	47.12	38.96	6.40					13.13	471.41	0.433	9158.00
M	60	9	13	2	1	8.32	0.66	1.51	10.62	4.91	220.00	<5.00	2.37	39.00	5.20	2.70	1.05	3.05	18.04	0.77	258.50	<0.006	52.00
M	79	12	16	2	1	2.43	0.29	1.67	4.47	4.90	133.00		0.61	40.00	5.01	1.77	1.08	3.20	22.61
F	90	10	7	2	1	9.34	0.57	1.59	11.52	5.78	221.00	131.49	29.75	38.20	10.21	2.13	1.07	4.81	14.57	2.05	41.15	0.150	2648.00
M	90	2	3	2	2	1.65	0.33	2.01	4.04	3.62	83.00	<5.00	2.18	37.90	4.03	0.75	1.35	2.08	24.99				1430.00
F	61	11	4	1	1	3.08	0.45	1.29	5.14	4.28	265.00		1.57	44.10	3.82	0.73	1.38	1.89	14.10
F	87	10	18	2	1	3.61	1.75	0.48	6.05	3.96	236.00		2.04	35.40	5.25	1.16	1.63	2.35		1.38	44.36	0.620	3028
M	40	6	13	2	2	10.43	1.08	1.71	13.25	5.75	215.00			52.70	6.40	2.09	1.45	4.67	27.40	0.65	55.74	<0.006	13.00
F	79	9	11	2	2	5.29	0.44	1.40	7.17	4.46	108.00	12.00	1.13	38.70	5.60	0.87	1.62	1.71		2.16	76.49	0.130	947.00
M	87	6	8	2	1	4.01	0.31	0.35	4.70	4.18	140.00	<5.00	0.59	38.66	7.80	0.49	1.26	1.83		5.38	483.68	<0.006	842.00
F	84	4	17	2	1	11.60	0.85	1.44	14.01	4.37	156.00		0.13	45.70	10.50	1.43	1.38	2.15		2.67	>1000.00	0.035	2338.00
M	56	10	20	2	2	8.79	0.53	1.62	11.02	4.64	189.00	28.65	9.16	44.10	5.57	1.12	1.16	3.70	11.02
F	52	13	22	2	2	10.23	0.56	1.34	12.20	4.02	187.00	<5.00	<0.50	41.10	6.60	0.51	1.87	1.48	16.59	1.13	24.94	<0.006	55.00
M	56	8	12	2	2	12.57	0.32	0.92	13.83	4.93	299.00	<5.00	1.84	32.30	7.90	0.60	1.28	2.63	20.63	3.79	114.84	<0.006	26.00
M	69	13	41	1	2	9.64	1.12	2.03	13.11	4.73	314.00	<5.00	1.30	42.20	10.28	1.53	1.01	1.78	11.83	0.86	32.32	<0.006	63.00
F	69	10	13	2	2	3.50	0.20	1.10	4.81	4.13	145.00	<5.00	1.08	33.64	5.70	0.58	1.49	1.02		1.70	34.73	<0.006	2136
F	68	13	1	2	2	2.18	0.35	0.98	3.62	4.22	197.00	<5.00	<0.50	35.70	4.33	0.94	1.20	1.74	12.84
F	92	12	4	2	1	2.43	0.36	1.10	3.94	3.52	212.00	12.35	1.66	41.90	5.16	0.83	0.79	2.25
F	85	9	16	2	1	7.28	0.37	0.95	8.60	4.53	174.00			44.90	8.92	0.84	1.81	4.93		1.71	111.50	0.096	3063.00
M	67	11	13	1	1	4.87	0.93	1.25	7.08	4.37	337		124.62	32.80	9.10	1.16	0.65	2.16	12.82	0.49	32.60	0.069	1754
F	79	12	3	2	1	2.34	0.32	0.57	3.31	3.97	200.00	5.09	3.07	37.00	4.78	1.40	1.27	1.93	12.77
M	67	6	17	2	2	9.88	0.62	0.55	11.06	4.85	186.00	33.99	5.39	37.30	8.51	0.69	1.50	1.91	14.05	3.44	43.76	0.116	6293.0
F	94	11	11	2	1	6.76	0.43	0.60	7.81	4.14	177.00	29.00	1.73	42.80	7.71	0.49	1.53	1.65	22.99	20.93	465.39	0.119	1494
M	56	10	15	2	2	8.95	1.02	2.78	12.79	5.61	152.00	14.97	32.29	44.00	6.10	1.79	0.75	3.09	17.36	2.10	241.60	<0.006	13.00
M	91	12	5	2	2	4.01	0.64	1.29	6.03	4.27	115.0			38.93	6.60	1.21	1.37	2.27		1.88	57.78	0.014	196.00
M	62	10	5	2	1	9.61	0.82	1.34	11.83	4.93	227.00	>200.00	13.37	41.50	5.57	0.93	1.14	2.29	23.29
M	55	13	2	1	1	4.24	0.49	1.97	6.89	4.67	262.00	<6.00	5.10	46.70	6.56	3.06	0.87	3.81	17.82
M	78	12	3	1	1	5.45	0.95	2.89	9.77	4.21	283.00	18.49	7.71	36.70	4.82	1.19	0.70	2.19	25.71	0.18	59.76	0.006	624.00
M	84	13	3	2	1	13.40	1.41	2.19	17.23	3.83	126.00	>200.00	57.94	32.90	6.01	0.87	0.73	1.65	21.53	0.33	86.28	0.023	359.00
M	72	5	12	2	2	7.45	0.66	0.75	8.95	4.73	135.00	>200.00	140.80	38.20	6.70	1.30	1.75	1.75	25.93	<0.18	104.85	0.035	1903.0
M	70	10	9	2	2	6.64	0.62	0.83	8.11	5.78	239		11.69	41.50	7.87	1.35	1.07	5.03	21.39
M	64	13	5	2	1
M	69	9	12	2	2	7.16	0.42	0.49	8.09	4.06	123.00	5.00	2.19	43.60	8.92	2.24	1.13	3.14	19.13	1.19	55.32	0.006
F	67	13	3	2	2	6.02	0.59	2.55	9.24	4.47	294.00	5.72	2.72	38.60	7.86	1.38	1.03	3.20	15.22
